# Supplementary material for: Adaptive multi-paddock grazing management’s influence on soil food web community structure for: increasing pasture forage production, soil organic carbon, and reducing soil respiration rates in southeastern USA ranches
Source: PeerJ journal article supplement (doi:10.7717/peerj.13750), 2022-07-19

**Figure S-2-** Years of Adoption of Adaptive Multi-Paddock (AMP) grazing management compared to standing crop biomass. Figure a) depicts all five AMP farms number of years of adoption and their moderate direct correlation with standing crop biomass ( $R^2= 0.2782$ ;  $p= 0.361$ ). Figure b) relays the linear regression analysis ( $R^2= 0.9194$ ;  $p= 0.04$ ) with the removal of AMP-5 to demonstrate a strong direct relationship indicating the longer AMP practices are employed, the greater the production of standing crop biomass.

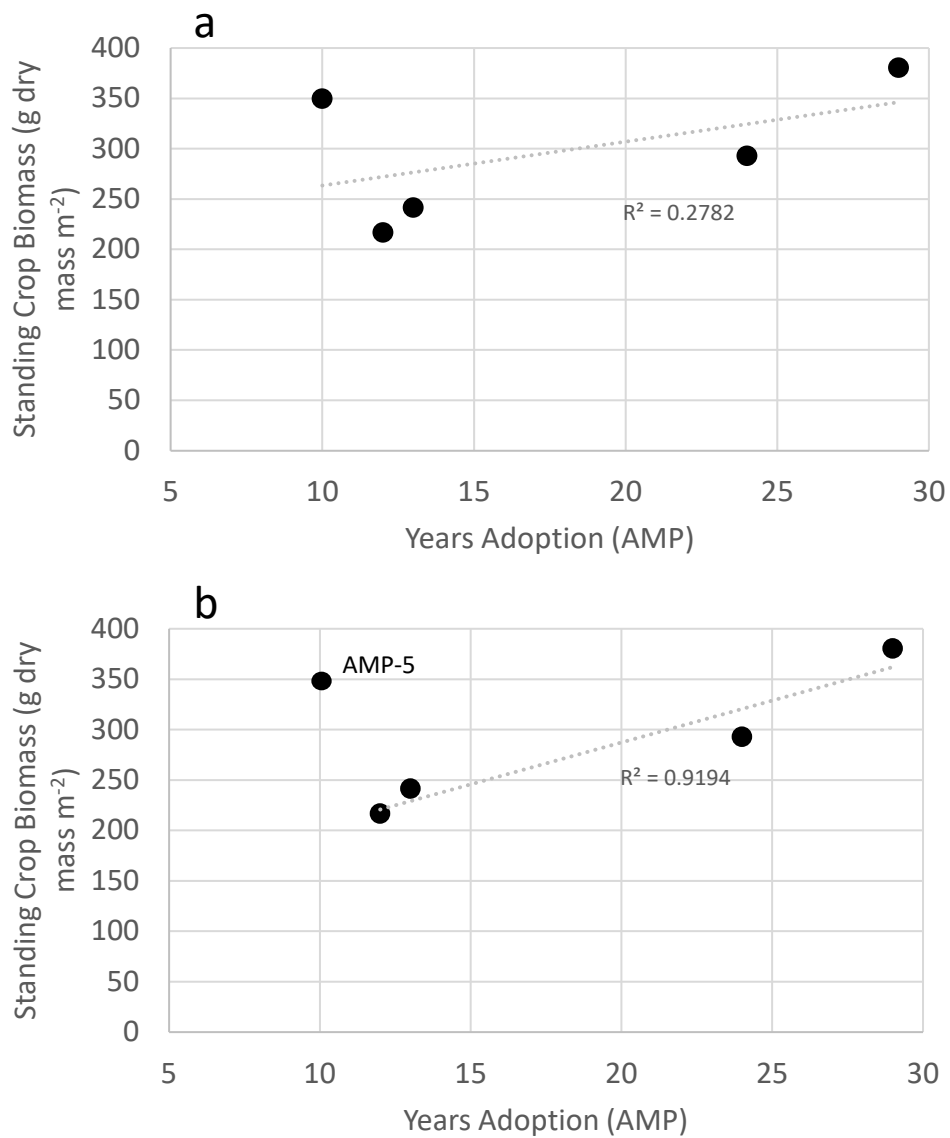

Supplement: Figure_S-2.pdf [file Figure_S-2.pdf]
