# Supplementary material for: Adaptive multi-paddock grazing management’s influence on soil food web community structure for: increasing pasture forage production, soil organic carbon, and reducing soil respiration rates in southeastern USA ranches
Source: PeerJ journal article supplement (doi:10.7717/peerj.13750), 2022-07-19

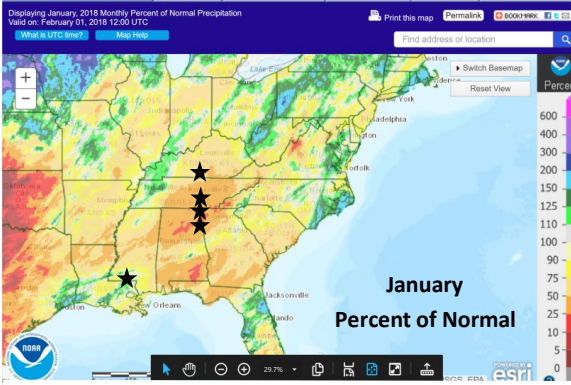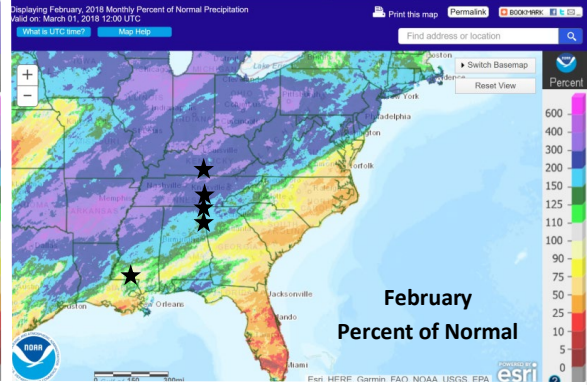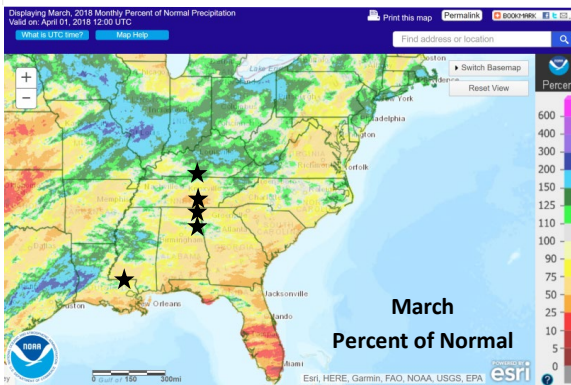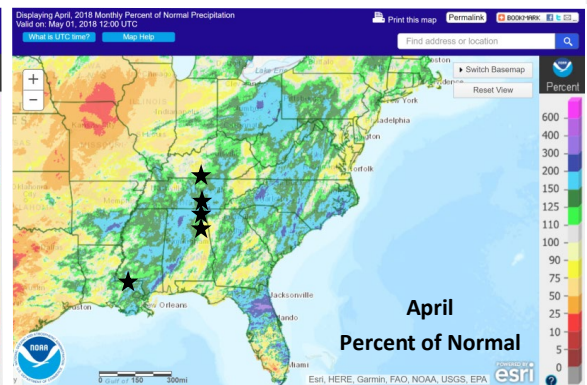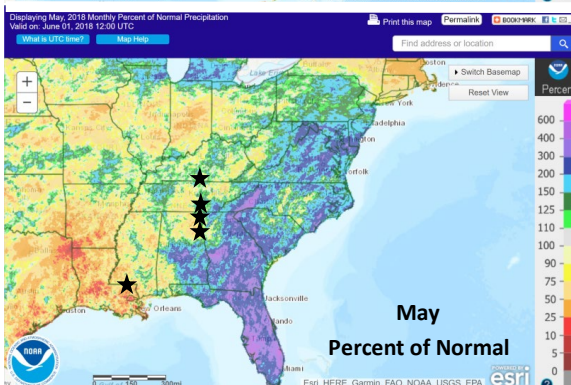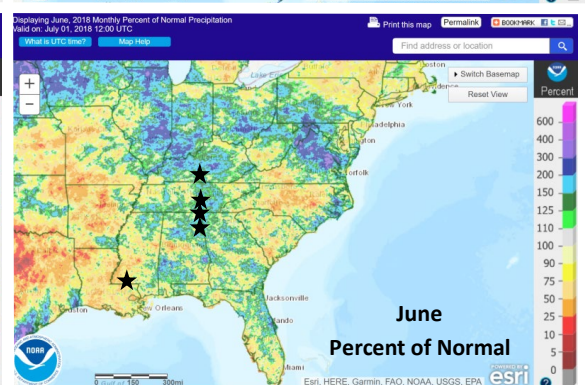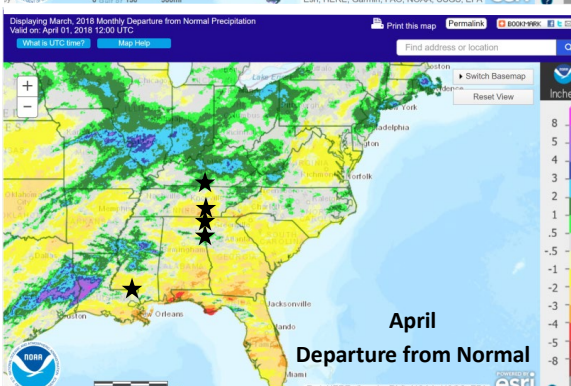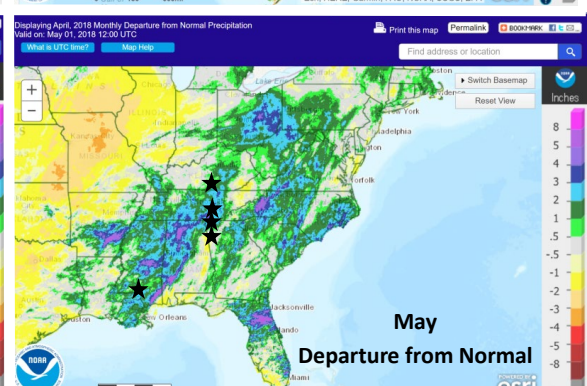

Supplement: Figure_S1.pdf [file Figure_S1.pdf]
