# Supplementary material for: Adaptive multi-paddock grazing management’s influence on soil food web community structure for: increasing pasture forage production, soil organic carbon, and reducing soil respiration rates in southeastern USA ranches
Source: PeerJ. 2022 Jul 19;10:e13750. doi: 10.7717/peerj.13750 (PMC9306548; doi:10.7717/peerj.13750)
Supplement: Supplemental Information 6 [file peerj-10-13750-s006.xlsx]

## Sheet: Soil Food Web
Soil Food Web
Sample_Name	Bacteria	Actinobacteria	Fungi	F:B Ratio	Total Protozoa	Flagellates	Amoeba				Sample_Name	Bacteria	Actinobacteria	Fungi	F:B Ratio	Total Protozoa	Flagellates	Amoeba
	ug gm-1 dry soil	ug gm-1 dry soil	ug gm-1 dry soil		# gm-1 dry soil							ug gm-1 dry soil	ug gm-1 dry soil	ug gm-1 dry soil		# gm-1 dry soil
AMP-1.1	2700	0.1	0	0	0	0	0				CG-1.1	4400	0	10	0.00227273	0	0	0
AMP-1.2	3780	0.2	120	0.031746	0	0	0				CG-1.2	8090	0	10	0.00123609	0	0	0
AMP-1.3	8870	0.1	0	0	0	0	0				CG-1.3	5900	0	0	0	0	0	0
AMP-1.4	2110	0.1	30	0.014218	0	0	0				CG-1.4	3820	0.2	0	0	0	0	0
AMP-1.5	11380	0	50	0.00439367	0	0	0				CG-1.5	3820	0.2	10	0.0026178	0	0	0
AMP-1.6	1930	0	10	0.00518135	0	0	0				CG-1.6	2540	0.2	40	0.015748	0	0	0
AMP-1.7	6280	0	30	0.00477707	0	0	0				CG-1.7	1410	0.2	10	0.0070922	0	0	0
AMP-1.8	7040	0.2	10	0.00142045	4100	0	4100				CG-1.8	5120	0.2	0	0	0	0	0
AMP-1.9	3850	0.1	0	0	0	0	0				CG-1.9	6130	0	0	0	4100	0	4100
AMP-1.10	9520	0.4	0	0	0	0	0				CG-1.10	3160	0	0	0	0	0	0
AMP-1.11	3210	0.2	20	0.00623053	0	0	0				CG-1.11	3130	0.1	10	0.00319489	0	0	0
											CG-1.12	2900	0	10	0.00344828	2700	0	2700
AMP-2.1	4920	0.1	10	0.00203252	0	0	0				CG-1.13	6750	0.1	150	0.0222222	0	0	0
AMP-2.2	6200	0	30	0.00483871	0	0	0
AMP-2.3	10500	0.2	20	0.00190476	0	0	0				CG-2.1	11480	0.2	0	0	0	0	0
AMP-2.4	8930	0.3	10	0.00111982	0	0	0				CG-2.2	8450	0.2	10	0.00118343	0	0	0
AMP-2.5	2410	0	0	0	0	0	0				CG-2.3	10240	0.4	20	0.00195312	0	0	0
AMP-2.6	3680	0.1	30	0.00815217	0	0	0				CG-2.4	10400	0.1	0	0	4100	0	4100
AMP-2.7	2620	0	20	0.00763359	0	0	0				CG-2.5	9590	0.5	40	0.00417101	0	0	0
AMP-2.8	2900	0.1	10	0.00344828	0	0	0				CG-2.6	5480	0.8	30	0.00547445	0	0	0
AMP-2.9	7660	0	0	0	0	0	0				CG-2.7	9030	0	110	0.0121816	0	0	0
AMP-2.10	4860	0.1	10	0.00205761	0	0	0				CG-2.8	6490	0.3	30	0.0046225	0	0	0
AMP-2.11	5770	0.2	10	0.0017331	0	0	0				CG-2.9	5670	0.5	40	0.00705467	0	0	0
AMP-2.12	8930	0	0	0	0	0	0				CG-2.10	18260	0.4	20	0.00109529	0	0	0
											CG-2.11	7860	0.3	20	0.00254453	0	0	0
AMP-3.1	3130	0.1	30	0.00958466	12300	4100	8200				CG-2.12	14610	0.3	40	0.00273785	0	0	0
AMP-3.2	930	0.5	30	0.0322581	32600	0	32600
AMP-3.3	2110	0.1	60	0.028436	16300	16300	0				CG-3.1	7340	0.4	0	0	0	0	0
AMP-3.4	3290	0.2	30	0.00911854	0	0	0				CG-3.2	7700	0.2	10	0.0012987	0	0	0
AMP-3.5	6070	0.6	40	0.00658979	0	0	0				CG-3.3	3100	0.6	10	0.00322581	8200	0	8200
AMP-3.6	1960	0.4	90	0.0459184	8200	4100	4100				CG-3.4	4110	0.2	280	0.0681265	0	0	0
AMP-3.7	2030	0.45	130	0.0640394	32600	16300	16300				CG-3.5	1630	0.3	90	0.0552147	16300	0	16300
AMP-3.8	3520	0.2	120	0.0340909	4100	4100	0				CG-3.6	3420	0.2	110	0.0321637	0	0	0
AMP-3.9	1120	0.9	120	0.107143	32600	16300	16300				CG-3.7	11580	0	0	0	0	0	0
AMP-3.10	3490	0.3	50	0.0143266	28500	16300	12200				CG-3.8	5670	0.2	50	0.00881834	0	0	0
AMP-3.11	3030	0.3	20	0.00660066	0	0	0				CG-3.9	2800	0.2	10	0.00357143	0	0	0
AMP-3.12	2320	0.4	30	0.012931	0	0	0				CG-3.10	7300	0.4	30	0.00410959	0	0	0
											CG-3.11	4170	0.1	10	0.00239808	0	0	0
AMP-4.1	7860	0.2	3	0.000381679	0	0	0				CG-3.12	4630	0.5	50	0.0107991	0	0	0
AMP-4.2	2900	0.1	140	0.0482759	0	0	0
AMP-4.3	5120	0.3	0	0	0	0	0				CG-4.1	5800	0.8	100	0.0172414	0	0	0
AMP-4.4	2090	0.6	30	0.0143541	0	0	0				CG-4.2	24780	1.5	100	0.00403551	0	0	0
AMP-4.5	6590	0	0	0	0	0	0				CG-4.3	9720	0.3	20	0.00205761	0	0	0
AMP-4.6	4570	1.2	20	0.00437637	0	0	0				CG-4.4	4500	0.7	90	0.02	0	0	0
AMP-4.7	6070	0.1	10	0.00164745	0	0	0				CG-4.5	4430	0.4	20	0.00451467	0	0	0
AMP-4.8	6330	0.1	110	0.0173776	0	0	0				CG-4.6	8930	0	2	0.000223964	0	0	0
AMP-4.9	1530	1.1	120	0.0784314	48900	32600	16300				CG-4.7	6590	0	10	0.00151745	0	0	0
AMP-4.10	6520	0.2	10	0.00153374	0	0	0				CG-4.8	6000	0.2	70	0.0116667	0	0	0
AMP-4.11	2840	0.8	30	0.0105634	0	0	0				CG-4.9	4170	0.1	10	0.00239808	0	0	0
AMP-4.12	11800	0.2	30	0.00254237	0	0	0				CG-4.10	9000	0	20	0.00222222	0	0	0
											CG-4.11	5150	0.3	30	0.00582524	0	0	0
AMP-5.1	2700	0.3	90	0.0333333	0	0	0				CG-4.12	8610	0.6	30	0.00348432	0	0	0
AMP-5.2	7170	0.5	110	0.0153417	0	0	0
AMP-5.3	6070	0.4	100	0.0164745	16300	0	16300				CG-5.1	5050	0.7	70	0.0138614	24500	8200	16300
AMP-5.4	5350	0	10	0.00186916	8200	0	8200				CG-5.2	3000	1.3	160	0.0533333	0	0	0
AMP-5.5	4960	0.7	30	0.00604839	0	0	0				CG-5.3	1860	0.5	10	0.00537634	0	0	0
AMP-5.6	2770	1.3	120	0.0433213	8200	8200	0				CG-5.4	2670	0.6	50	0.0187266	16300	0	16300
AMP-5.7	3070	0.3	0	0	8200	0	8200				CG-5.5	5050	0.7	40	0.00792079	0	0	0
AMP-5.8	3000	0.8	40	0.0133333	16300	0	16300				CG-5.6	3460	1.2	80	0.0231214	8200	0	8200
AMP-5.9	2960	1	70	0.0236486	8200	0	8200				CG-5.7	1960	0.3	20	0.0102041	0	0	0
AMP-5.10	4700	0.7	10	0.00212766	16300	0	16300				CG-5.8	1060	0.7	180	0.169811	8200	0	8200
AMP-5.11	3100	0.8	40	0.0129032	0	0	0				CG-5.9	3750	0.3	30	0.008	0	0	0
AMP-5.12	1790	0.1	20	0.0111732	16300	0	16300				CG-5.10	3680	0.3	30	0.00815217	0	0	0
AMP-5.13	2900	0.5	100	0.0344828	16300	16300	0				CG-5.11	2610	0.3	10	0.00383142	0	0	0

## Sheet: Soil Organic Carbon
Soil Organic Carbon (%)
AMP-1	CG-1	AMP-2	CG-2	AMP-3	CG-3	AMP-4	CG-4	AMP-5	CG-5
2.962	2.829	2.237	2.34	2.27	1.334	2.09367	1.84933	4.351	3.55067
3.015	2.228	2.845	3.037	2.439	1.75	3.43533	1.495	4.17467	3.76733
2.805	2.718	2.184	2.316	1.755	1.233	1.61567	1.811	4.36167	2.81333
2.287	3.283	2.244	2.312	2.495	1.547	3.16267	1.744	5.572	2.49633
2.872	3.095	3.297	2.342	2.395	1.597	1.60133	1.79467	3.86467	3.49567
2.929	4.166	2.95	2.417	2.243	2.064	1.913	2.646	5.27267	3.868
2.635	3.458	2.247	2.005	2.318	1.357	2.29767	2.07633	4.51933	2.656
2.478	1.904	2.25	2.317	3.066	1.016	2.44033	1.663	4.934	2.74167
2.497	2.822	2.244	1.977	2.132	1.627	2.53333	2.02633	4.75433	2.95633
2.118	3.258	2.098	2.464	1.84	1.404	2.44033	1.825	4.608	2.81833
2.664	3.036	1.98	2.831	2.202	1.569	2.185	1.82533	3.38567	2.36033
1.834	2.859	2.702	1.852	2.161	1.428	2.95567	1.72067	4.128	3.458

## Sheet: Standing Crop Biomass
Standing Crop Biomass (g dry biomass m-2)
Quadrat Number	AMP-1	CG-1		AMP-2	CG-2		AMP=3	CG-3		AMP-4	CG-4		AMP-5	CG-5
1	37.5455	16.0591		24.3548	41.5655		46.3463	12.0848		36.058	7.12013		54.75	20.16
2	71.4848	16.0591		9.74191	37.409		37.9197	12.0848		20.6046	10.6802		45.625	18.06
3	23.9697	16.0591		40.5913	49.8786		58.9862	8.05653		20.6046	14.2403		43.8	25.2
4	20.7879	21.4121		28.4139	16.6262		25.2798	8.05653		41.2091	12.4602		29.2	23.94
5	17.1818	19.2709		12.1774	24.9393		21.0665	7.25088		41.2091	17.8003		28.47	21
6	30.3333	16.0591		32.473	49.8786		42.133	9.66784		25.7557	14.2403		21.17	18.48
7	15.4848	16.0591		20.2956	58.1917		58.9862	8.05653		36.058	7.12013		33.215	8.82
8	35.2121	10.706		7.30643	20.7828		50.5596	10.4735		51.5114	10.6802		29.93	15.96
9	24.1818	7.49423		14.6129	49.8786		54.7729	8.86219		51.5114	14.2403		21.17	9.24
10	26.7273	12.8473		4.05913	58.1917		16.8532	17.7244		61.8137	10.6802		58.4	13.86
11	19.9394	8.56484		8.11826	24.9393		46.3463	4.83392		51.5114	12.4602		19.345	11.34
12	16.7576	19.2709		12.1774	29.0959		58.9862	17.7244		51.5114	12.4602		36.5	14.28
13	28.6364	16.0591		12.1774	24.9393		37.9197	9.66784		46.3602	8.90017		51.1	21
14	33.7273	18.2003		11.3656	20.7828		29.4931	12.0848		30.9068	12.4602		17.52	28.14
15	27.7879	21.4121		32.473	24.9393		29.4931	7.25088		46.3602	14.2403		28.47	22.26
16	34.7879	12.9265		17.246	8.8198		44.1219	7.31919		25.5548	9.49367		47.125	12.555
17	31.3939	23.2678		34.4921	8.8198		18.9094	5.85535		25.5548	9.49367		34.125	24.18
18	29.2727	25.8531		25.869	14.1117		9.45469	6.58727		36.5068	7.59494		35.75	11.625
19	25.8788	20.6825		6.89841	22.0495		31.5156	10.9788		32.8562	11.3924		35.75	32.55
20	28.2121	20.6825		34.4921	52.9188		50.425	10.9788		20.4438	11.3924		45.5	16.275
21	17.5813	31.0237		34.4921	44.099		44.1219	8.78303		10.9521	15.1899		42.25	17.205
22	16.9458	31.0237		34.4921	44.099		25.2125	10.2469		18.2534	11.3924		42.25	23.25
23	30.0788	38.7796		17.246	48.5089		44.1219	5.85535		8.76164	13.2911		29.25	32.55
24	22.665	36.1943		8.62302	15.8756		40.9703	10.9788		11.6822	18.9873		13	33.015
25	23.936	38.7796		17.246	17.6396		34.6672	5.85535		14.6027	11.3924		32.5	23.715
26	20.5468	31.0237		17.246	52.9188		44.1219	6.58727		8.76164	15.1899		47.125	22.32
27	16.734	25.8531		30.1806	52.9188		37.8188	5.85535		8.76164	9.49367		32.5	32.085
28	12.0739	25.8531		6.89841	48.5089		34.6672	8.78303		16.063	15.1899		42.25	33.015
29	12.0739	18.0971		34.4921	61.7386		28.3641	14.6384		20.4438	7.59494		29.25	24.18
30	20.1232	20.6825		60.3611	61.7386			13.1745		7.30137	18.9873		22.75	36.27
31	11.8621
32	13.133
33	18.2167
34	15.4631
35	15.2512
Average g dry biomass/1,000 cm2 Quadrat	24.1711	21.2085		21.6871	36.2268		38.0563	9.54524		29.3162	12.1953		35.0013	21.551
Standing Crop Biomass (g dry biomass m-2)	241.711	212.085		216.871	362.268		380.563	95.4524		293.162	121.953		350.013	215.51

## Sheet: Respiration _Data
	Date	TIME START	TIME END	TOTAL TIME	Days	H20 IN	H2O END	TOTAL H2O	COND 1	COND 2	COND 3	Average Cond	COND	Model trend	G C/jar are/day	gCO2/m2/day	g C/m2/day
															0.272921	363.522
														192.2	g CO2/ml STP	areas of jar/m2
														ml CO2/area of glass jar	0.00196429	gCO2/m2/day	gC/m2/day
AMP-1.1	2019-06-07	10:16:00	11:01:00	24.0312	1.0013	5.5272	5.4284	0.0988	159.9	159.7	159.7	159.767	159.767	59.3168	0.0317995	11.5598	3.15325
AMP-1.2	2019-06-07	10:01:00	11:08:00	24.0465	1.00194	5.4284	3.3518	2.0766	167.7	168	168	167.9	167.9	44.3702	0.0237867	8.64698	2.3587
AMP-1.3	2019-06-07	10:50:00	11:57:00	24.0465	1.00194	5.4945	4.0185	1.476	165.3	165	165	165.1	165.1	49.5157	0.0265452	9.64976	2.63223
AMP-1.4	2019-06-07	10:06:00	11:33:00	24.0604	1.00252	5.3409	2.9527	2.3882	166.9	166.7	166.4	166.667	166.667	46.6367	0.0250017	9.08868	2.47918
AMP-1.5	2019-06-07	10:00:00	11:14:00	24.0514	1.00214	5.4986	4.5851	0.9135	170.6	170.6	170.6	170.6	170.6	39.4084	0.0211267	7.68001	2.09493
AMP-1.6	2019-06-07	10:49:00	12:02:00	24.0507	1.00211	5.5269	4.1194	1.4075	172.6	172.5	172.6	172.567	172.567	35.7942	0.0191891	6.97568	1.9028
AMP-1.7	2019-06-07	10:18:00	12:08:00	24.0764	1.00318	4.1194	1.4622	2.6572	169.3	169.2	169.4	169.3	169.3	41.7974	0.0224074	8.14559	2.22193
AMP-1.8	2019-06-07	10:24:00	11:27:00	24.0437	1.00182	5.5073	3.8338	1.6735	161.6	161.8	161.5	161.633	161.633	55.8864	0.0299605	10.8913	2.97089
CG-1.1	2019-06-07	12:38:00	01:42:00	23.5444	0.981019	5.4665	4.3104	1.1561	170	169.8	169.9	169.9	169.9	40.6948	0.0218163	7.9307	2.16331
CG-1.2	2019-06-07	12:03:00	01:36:00	23.5646	0.981858	5.5103	3.9592	1.5511	164.4	164.2	164.4	164.333	164.333	50.9246	0.0273005	9.92433	2.70713
CG-1.3	2019-06-07	12:05:00	01:02:00	23.5396	0.980816	5.5179	3.9617	1.5562	164.3	164.2	164.3	164.267	164.267	51.0471	0.0273662	9.9482	2.71364
CG-1.4	2019-06-07	12:40:00	02:05:00	23.559	0.981626	5.5366	4.3296	1.207	161.9	162	162.2	162.033	162.033	55.1513	0.0295664	10.748	2.93182
CG-1.5	2019-06-07	12:30:00	01:48:00	23.5542	0.981424	5.5012	4.3778	1.1234	143.1	143.3	143.1	143.167	143.167	89.8226	0.0481535	17.5049	4.77492
CG-1.6	2019-06-07	12:08:00	01:12:00	23.5444	0.981019	5.4047	2.736	2.6687	177.8	177.8	177.9	177.833	177.833	26.1157	0.0140005	5.08949	1.3883
CG-1.7	2019-06-07	12:29:00	01:53:00	23.5583	0.981597	5.387	3.6498	1.7372	165.1	165	165	165.033	165.033	49.6382	0.0266108	9.67363	2.63874
CG-1.8	2019-06-07	12:19:00	01:24:00	23.5451	0.981047	5.5133	4.5763	0.937	159	159	159	159	159	60.7257	0.0325548	11.8344	3.22815
CG-1.9	2019-06-07	12:15:00	01:17:00	23.5431	0.980961	5.555	3.7374	1.8176	165.3	164.9	165	165.067	165.067	49.577	0.026578	9.66169	2.63549
AMP2.1
CG2.1
AMP-3.1	2019-06-01	08:46:00	09:18:00	24.0222	1.00093	5.0472	3.6884	1.3588	168.3	168.6	168.5	168.467	168.467	43.3288	0.0232284	8.44403	2.30334
AMP-3.2	2019-06-01	08:26:00	08:13:00	23.991	0.999624	3.6862	0.9982	2.688	182.4	182.6	182.6	182.533	182.533	17.4785	0.00937015	3.40626	0.929148
AMP-3.3	2019-06-01	08:40:00	08:48:00	24.0056	1.00023	5.3469	4.5477	0.7992	179.8	180.2	180.2	180.067	180.067	22.0115	0.0118003	4.28966	1.17012
AMP-3.4	2019-06-01	08:29:00	08:25:00	23.9972	0.999884	4.5453	3.0002	1.5451	174.6	174.9	174.9	174.8	174.8	31.69	0.0169889	6.17584	1.68463
AMP-3.5	2019-06-01	08:53:00	08:54:00	24.0007	1.00003	5.4679	3.7051	1.7628	182.2	181.4	181.3	181.633	181.633	19.1324	0.0102568	3.72858	1.01707
AMP-3.6	2019-06-01	08:36:00	08:40:00	24.0028	1.00012	4.4703	3.2175	1.2528	178.1	178.3	178.4	178.267	178.267	25.3193	0.0135736	4.9343	1.34596
CG-3.1	2019-06-01	10:02:00	11:00:00	24.0403	1.00168	5.5388	3.5379	2.0009	180.4	180.4	180.6	180.467	180.467	21.2764	0.0114062	4.1464	1.13104
CG-3.2	2019-06-01	10:13:00	11:30:00	24.0535	1.00223	5.2947	4.3221	0.9726	167.6	167.5	162.4	165.833	165.833	48.1681	0.0258227	9.38712	2.56059
CG-3.3	2019-06-01	10:15:00	11:35:00	24.0556	1.00231	4.3221	2.2452	2.0769	170.7	170.9	170.8	170.8	170.8	39.0408	0.0209296	7.60838	2.07539
CG-3.4	2019-06-01	10:00:00	10:53:00	24.0368	1.00153	5.5282	4.1741	1.3541	173	173	173	173	173	34.9979	0.0187622	6.82048	1.86047
CG-3.5	2019-06-01	10:06:00	11:11:00	24.0451	1.00188	4.1741	2.5167	1.6574	166.5	166.4	166.5	166.467	166.467	47.0042	0.0251988	9.1603	2.49872
CG-3.6	2019-06-01	10:11:00	11:24:00	24.0507	1.00211	5.5161	3.8289	1.6872	169.7	169.7	169.9	169.767	169.767	40.9398	0.0219476	7.97846	2.17634
CG-3.7	2019-06-01	10:17:00	11:41:00	24.0583	1.00243	3.8289	3.0849	0.744	164	164.1	164	164.033	164.033	51.4759	0.027596	10.0318	2.73643
CG-3.8	2019-06-01	09:55:00	10.38	33.9668	1.41528	5.5424	3.7542	1.7882	170.8	170.9	170.9	170.867	170.867	38.9183	0.0208639	7.58451	2.06888
CG-3.9	2019-06-01	10:09:00	11:17:00	24.0472	1.00197	3.7527	2.3548	1.3979	171.5	171.5	171.7	171.567	171.567	37.6319	0.0201743	7.33381	2.00049
CG-3.10	2019-06-01	10:02:00	11:00:00	24.0403	1.00168	4.2079	3.07246	1.13544	168.883	168.938	169.341	169.054	169.054	42.2493	0.0226497	8.23366	2.24595
AMP=4.1	2019-05-27	08:48:00	09:45:00	24.0396	1.00165	5.48	3.3666	2.1134	164.6	165.2	165.2	165	165	49.6995	0.0266437	9.68557	2.642
AMP-4.2	2019-05-27	08:59:00	09:39:00	24.0278	1.00116	5.4111	3.8415	1.5696	168.9	169.1	168.8	168.933	168.933	42.4712	0.0227686	8.2769	2.25775
AMP=4.2	2019-05-27	08:27:00	09:29:00	24.0431	1.00179	5.5474	3.486	2.0614	168.1	168	167.9	168	168	44.1864	0.0236881	8.61116	2.34893
AMP-4.3	2019-05-27	09:02:00	09:41:00	24.0271	1.00113	5.5474	3.486	2.0614	158.9	158.8	158.8	158.833	158.833	61.032	0.032719	11.8941	3.24443
CG-4.1	2019-05-29	10:14:00	11:13:00	24.041	1.00171	5.451	2.9987	2.4523	165.9	165	165.9	165.6	165.6	48.5969	0.0260526	9.47069	2.58338
CG-4.2	2019-05-29	10:18:00	10:20:00	24.0014	1.00006	5.5431	3.0985	2.4446	171.6	171.6	171.6	171.6	171.6	37.5707	0.0201415	7.32187	1.99724
CG-4.3	2019-05-29	10:08:00	10:40:00	24.0222	1.00093	5.5172	3.0426	2.4746	176.7	176.6	176.6	176.633	176.633	28.3209	0.0151827	5.51926	1.50553
CG-4.4	2019-05-29	09:26:00	10:04:00	24.0264	1.0011	5.5197	2.9336	2.5861	178.6	178.3	178.3	178.4	178.4	25.0743	0.0134422	4.88655	1.33294
AMP-5.1	2019-05-23	10:38:00	12:06:00	24.0611	1.00255	4.4316	3.9445	0.4871	167.1	167.9	168.2	167.733	167.733	44.6765	0.0239509	8.70667	2.37498
AMP-5.2	2019-05-23	10:52:00	12:05:00	24.0507	1.00211	5.5391	1.6697	3.8694	163	163.4	163.3	163.233	163.233	52.9461	0.0283842	10.3183	2.81459
AMP-5.3	2019-05-23	11:56:00	12:28:00	24.0222	1.00093	5.5492	1.9683	3.5809	164.2	164.3	164.5	164.333	164.333	50.9246	0.0273005	9.92433	2.70713
AMP-5.4	2019-05-23	11:15:00	12:07:00	24.0361	1.0015	5.5241	2.5713	2.9528	158.9	160.3	160.3	159.833	159.833	59.1943	0.0317338	11.5359	3.14674
AMP-5.5	2019-05-23	12:03:00	12:27:00	24.0167	1.00069	5.2867	4.4955	0.7912	166.6	166.5	166.5	166.533	166.533	46.8817	0.0251331	9.13643	2.49221
AMP-5.6	2019-05-23	12:35:00	12:09:00	23.9819	0.999248	5.5056	5.2789	0.2267	176	176.1	176.2	176.1	176.1	29.301	0.0157082	5.71026	1.55763
AMP-5.7	2019-05-23	12:39:00	12:02:00	23.9743	0.998929	5.2789	3.9023	1.3766	170.6	170.8	170.9	170.767	170.767	39.1021	0.0209625	7.62032	2.07865
CG-5.1	2019-05-23	02:41:00	02:38:00	23.9979	0.999913	5.4762	4.7675	0.7087	162.1	162	161.8	161.967	161.967	55.2739	0.0296321	10.7719	2.93833
CG-5.2	2019-05-23	02:46:00	02:36:00	23.9931	0.999711	4.7675	3.4853	1.2822	169.3	169.2	169.2	169.233	169.233	41.9199	0.0224731	8.16946	2.22844
CG-5.3	2019-05-23	03:01:00	04:42:00	24.0701	1.00292	5.4723	2.8255	2.6468	137	137	137.3	137.1	137.1	100.971	0.0541303	19.6776	5.36758
CG-5.4	2019-05-23	02:58:00	04:27:00	24.0618	1.00258	5.5408	3.0597	2.4811	142.5	142.3	142.4	142.4	142.4	91.2315	0.0489088	17.7794	4.84982
CG-5.5	2019-05-23	02:51:00	03:56:00	24.0451	1.00188	5.5208	3.7621	1.7587	154.7	154.5	154.5	154.567	154.567	68.8728	0.0369224	13.4221	3.66124
CG-5.6	2019-05-23	03:07:00	04:21:00	24.0514	1.00214	5.4948	3.6342	1.8606	149.1	148.9	149	149	149	79.1027	0.0424066	15.4157	4.20506
CG-5.7	2019-05-23	03:11:00	04:17:00	24.0458	1.00191	5.5268	2.7004	2.8264	157.7	157.9	157.9	157.833	157.833	62.8697	0.0337042	12.2522	3.34212
CG-5.8	2019-05-23	03:15:00	04:08:00	24.0368	1.00153	5.1477	2.3944	2.7533	146.9	146.9	146.9	146.9	146.9	82.9619	0.0444755	16.1678	4.41021
CG-5.9	2019-05-23	03:18:00	04:03:00	24.0312	1.0013	5.4329	3.0251	2.4078	151.1	151.1	151.1	151.1	151.1	75.2435	0.0403377	14.6637	3.99991
