# Supplementary material for: Adaptive multi-paddock grazing management’s influence on soil food web community structure for: increasing pasture forage production, soil organic carbon, and reducing soil respiration rates in southeastern USA ranches
Source: PeerJ journal article supplement (doi:10.7717/peerj.13750), 2022-07-19
Supplement: Table_S-1.pdf [file Table_S-1.pdf]

| Farm pair | Catena position | Soil series                   | Map unit | Slope% | Taxonomic classification                                    |
|-----------|-----------------|-------------------------------|----------|--------|-------------------------------------------------------------|
| Pair 1    | Flat            | Trimble gravelly silt loam    | TrB2     | 2-6    | Fine-loamy, siliceous, semiactive, mesic Typic Paleudults   |
|           | Slope           |                               | TrC2     | 6-12   |                                                             |
| Pair 2    | Flat            | Emory silt loam               | Ea       | 0-2    | Fine-loamy, siliceous, semiactive, thermic Typic Paleudults |
|           | Slope           | Cumberland silty clay loam    | Cm       | 2-5    | Fine, mixed, semiactive, thermic Rhodic Paleudalfs          |
| Pair 3    | Flat            | Hartsell fine sandy loam      | Hc       | 2-6    | Fine-loamy, siliceous, subactive, thermic Typic Hapludults  |
|           | Slope           |                               | Hd       | 6-10   |                                                             |
| Pair 4    | Flat            | Cumberland gravelly loam      | CoB2     | 2-6    | Fine, kaolinitic, thermic Rhodic Paleudults                 |
|           | Slope           | Cumberland gravelly clay loam | CrC3     | 6-10   | Fine, mixed, semiactive, thermic Rhodic Paleudalfs          |
| Pair 5    | Flat            | Loring silt loam              | 12B2     | 2-5    | Fine-silty, mixed, active, thermic Oxyaquic Fragiudalfs     |
|           | Slope           |                               | 12C2     | 5-8    |                                                             |
