# Supplementary material for: Adaptive multi-paddock grazing management’s influence on soil food web community structure for: increasing pasture forage production, soil organic carbon, and reducing soil respiration rates in southeastern USA ranches
Source: PeerJ journal article supplement (doi:10.7717/peerj.13750), 2022-07-19
Supplement: Table_S-2.pdf [file Table_S-2.pdf]

Pairwise Comparison

|       | Bacteria<br>(ug g-1 dry soil) |   |            |                  | Fungi<br>(ug g-1 dry soil) |   |       | F:B Ratio |               |   | Soil Foodweb (Proxy)<br>(Normalized) |                  |               | Protozoa<br>(# g <sup>-1</sup> dry soil) |              |                                 |               |   |             |                  |
|-------|-------------------------------|---|------------|------------------|----------------------------|---|-------|-----------|---------------|---|--------------------------------------|------------------|---------------|------------------------------------------|--------------|---------------------------------|---------------|---|-------------|------------------|
| AMP-1 | 5,515                         | ± | 991        | NS               | 24.55                      | ± | 10.73 | NS        | 0.0062        | ± | 0.003                                | NS               | 0.0359        | ±                                        | 0.012        | NS                              | 410           | ± | 410         | NS               |
| CG-1  | 9,797                         | ± | 1,069      |                  | 30.00                      | ± | 8.35  |           | 0.0036        | ± | 0.001                                |                  | 0.0245        | ±                                        | 0.009        |                                 | 523           | ± | 363         |                  |
| AMP-2 | 5,782                         | ± | 786        | NS               | 12.50                      | ± | 3.05  | NS        | 0.0027        | ± | 0.001                                | NS               | 0.0215        | ±                                        | 0.005        | <b>p= 6.5 x 10<sup>-4</sup></b> | 0             | ± | 0           | NS               |
| CG-2  | 4,398                         | ± | 527        |                  | 19.23                      | ± | 11.29 |           | 0.0044        | ± | 0.002                                |                  | <b>0.0400</b> | ±                                        | <b>0.007</b> |                                 | 341.66        | ± | 342         |                  |
| AMP-3 | 2,750                         | ± | 393        | <b>p= 0.0117</b> | 62.50                      | ± | 11.88 | NS        | <b>0.0309</b> | ± | <b>0.009</b>                         | <b>p= 0.0349</b> | <b>0.1684</b> | ±                                        | <b>0.034</b> | <b>p= 0.01209</b>               | <b>13,933</b> | ± | <b>4056</b> | <b>p= 0.0129</b> |
| CG-3  | <b>5,288</b>                  | ± | <b>801</b> |                  | 54.17                      | ± | 22.98 |           | 0.0158        | ± | 0.007                                |                  | 0.0544        | ±                                        | 0.015        |                                 | 2,041         | ± | 1,463       |                  |
| AMP-4 | 5,352                         | ± | 828        | NS               | 41.92                      | ± | 14.65 | NS        | 0.0150        | ± | 0.007                                | NS               | 0.0880        | ±                                        | 0.040        | NS                              | 4,075         | ± | 4,075       | NS               |
| CG-4  | 8,140                         | ± | 1,617      |                  | 41.83                      | ± | 10.73 |           | 0.0072        | ± | 0.002                                |                  | 0.0415        | ±                                        | 0.010        |                                 | 0             | ± | 0           |                  |
| AMP-5 | 3,888                         | ± | 442        | NS               | 56.92                      | ± | 11.90 | NS        | 0.0165        | ± | 0.004                                | NS               | 0.1008        | ±                                        | 0.015        | NS                              | 8,792         | ± | 1,949       | NS               |
| CG-5  | 3,105                         | ± | 381        |                  | 61.82                      | ± | 17.52 |           | 0.0293        | ± | 0.015                                |                  | 0.1827        | ±                                        | 0.066        |                                 | 5,200         | ± | 2,527       |                  |

Pooled Comparison

|     | Bacteria<br>(ug g-1 dry soil) |   |              |                 | Fungi<br>(ug g-1 dry soil) |   |       | F:B Ratio |         |   | Soil Foodweb (Proxy)<br>(Normalized) |    |         | Protozoa<br>(# g <sup>-1</sup> dry soil) |        |    |              |   |              |                  |
|-----|-------------------------------|---|--------------|-----------------|----------------------------|---|-------|-----------|---------|---|--------------------------------------|----|---------|------------------------------------------|--------|----|--------------|---|--------------|------------------|
| AMP | 4659.492                      | ± | 345.4        | <b>p= 0.029</b> | 39.2034                    | ± | 5.428 | NS        | 0.01403 | ± | 0.003                                | NS | 0.08402 | ±                                        | 0.0128 | NS | <b>5,575</b> | ± | <b>1,370</b> | <b>p= 0.0187</b> |
| CG  | <b>5864.283</b>               | ± | <b>427.3</b> |                 | 40.7                       | ± | 6.769 |           | 0.01162 | ± | 0.003                                |    | 0.06598 | ±                                        | 0.0144 |    | 1,543        | ± | 590          |                  |
